# Supplementary figures and images for: The Complete Chloroplast Genome of Catha edulis: A Comparative Analysis of Genome Features with Related Species
Source: MDPI journal article supplement (doi:10.3390/ijms19020525), 2018-02-09

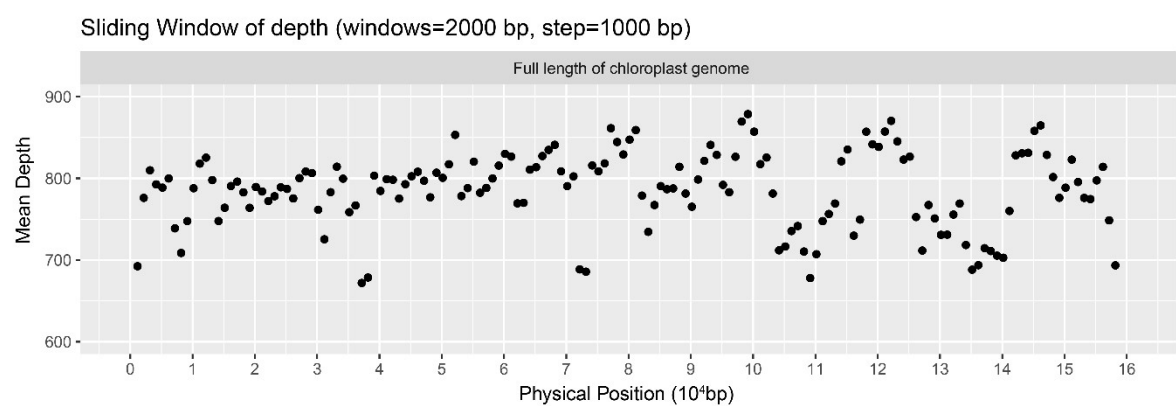

Figure S1

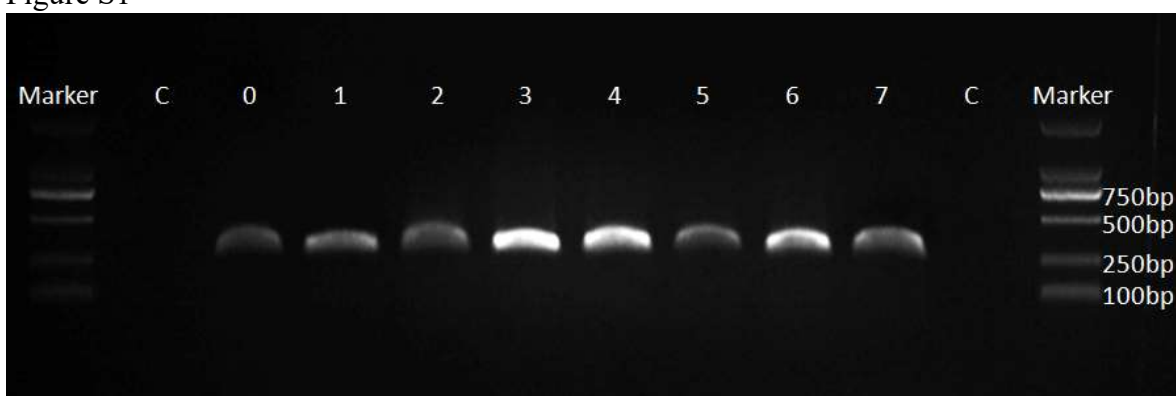

Figure S2

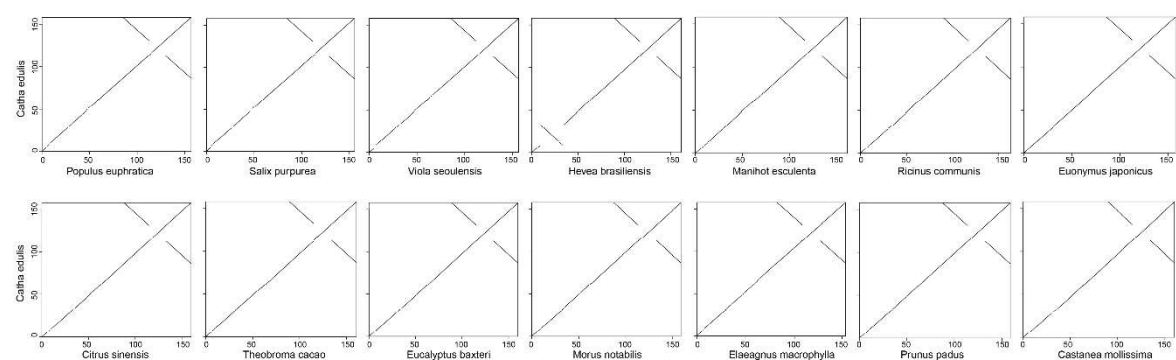

Figure S3

Supplement: s1 [file s1]
